# Supplementary material for: Lived Experiences of Menstrual Cup Adoption among Reproductive-age Women: A Qualitative Study Exploring Perspectives of Menstrual Cup Users, Non-Users, and Dropouts from Eastern India
Source: Research Square preprint supplement (doi:10.21203/rs.3.rs-8367033/v1), 2026-01-23
Supplement: Supplementary file 1 [file 7229d4c2a505a573b632a39e.docx]

**QUALITATIVE INTERVIEW GUIDE**

**___________________________________________________________________________**

**Title:** Lived Experiences of Menstrual Cup Use, Non-Use, and Discontinuation

**Target groups:**

1. Menstrual Cup Users
2. Menstrual Cup Non-Users
3. Menstrual Cup Dropouts (tried but discontinued)

**Method:** In-Depth Interviews (IDIs)
**Setting:** Private, comfortable location
**Ethical note:** Obtained written informed consent and asked Shall we proceed with audio recordings?

___________________________________________________________________________

**SECTION A: INTRODUCTION & RAPPORT BUILDING**

1. Can you tell me a little about yourself?
2. At what age did you start menstruating?
3. Can you describe how you usually manage your periods?
4. What are your beliefs or cultural practices related to menstruation in your family or community?

**(Probes:** Any restrictions like in cooking, worship, social interactions, hygiene practices)

1. As per your knowledge, what are the various methods available to maintain the menstrual cycle? (**Probes**- Where did you get to know about all the menstrual products available? When did you know about it? Before your menstruation starts or after you start your period)
2. What menstrual products have you used so far in your life? (Prob- Like pad any other products you know about)

**_______________________________________________________________________**

**SECTION B: AWARENESS & PERCEPTIONS OF MENSTRUAL CUP (All**

**Participants)**

1. When and how did you first hear about the menstrual cup?
2. What were your first thoughts or reactions when you heard about it?
3. What information did you receive about its use, safety, and benefits? **(Probes:** source of information (friends, health workers, social media), trust in source)

**_____________________________________________________________________**

**SECTION C1: MENSTRUAL CUP USERS**

1. What motivated you to start using a menstrual cup?
2. Can you describe your first experience of using it? **(Probes:** How you got to know, where you bought it and its cost?)
3. What challenges did you face initially, if any? **(Probes:** Insertion, removal, pain, fear, leakage, hygiene, cleaning)
4. How did your experience change over time?
5. How does menstrual cup use affect your daily life? : (Both the initial days and current use)

[Probes: Daily activities/Work/school/Sleep/Travel]

1. What support helped you continue using the cup? (**Probes:** training, peer support, family support, health worker guidance)
2. What is your process for using and storing MC?
3. Do u face any difficulty while cleaning (at home/Hostel/Workplace) or storing? (Any taboo related to it)
4. How do you perceive the menstrual cup compared to pads/cloth/tampons?
5. Would you recommend the menstrual cup to others? Why or why not?

___________________________________________________________________________

**SECTION C2: MENSTRUAL CUP NON-USERS (Both for Pads and Cloth Pads)**

1. What are the main reasons you have not used a menstrual cup instead of a good knowledge of MC?
2. Are there any concerns or fears related to menstrual cup use? (**Probes:** virginity, internal use, pain, cleanliness, religious or cultural beliefs)

3. Do you feel you have enough information about menstrual cups, and would you be open to trying one in the future?

4. a. How do you manage to get your pads (at home/Workplace /Hostel/during travel) and how much do you spend in a month?

4. b. In what time interval do you change those cloth pads?

c. How many pads do you use at a time, and what is their cost?

d. How do you manage to clean it and dry it in bad weather?

**SECTION C3: MENSTRUAL CUP DROPOUTS**

1. Can you tell me why you decided to try a menstrual cup initially?
2. How many cycles did you use it for? (**Probes:** Is that a continuous use or sometimes)
3. What difficulties did you experience that made you stop using it? **(Probes:** physical discomfort, anxiety, difficulty in removal, lack of support, family opposition)
4. Was there any moment when you felt you might continue but didn’t? Why?
5. What kind of support do you think could have helped you continue using the cup?

___________________________________________________________________________

**SECTION D: SOCIAL, CONTEXTUAL, AND HEALTH-RELATED FACTORS (All Participants)**

1. How do family members or partners perceive menstrual cup use, and how do their views influence your decision?
2. What role do friends, peers, or community health workers play in shaping your awareness, confidence, or decision regarding menstrual cup use?
3. How do access to water, privacy, and sanitation facilities influence your ability or willingness to use a menstrual cup?
4. Do you have any concerns related to the health or safety of menstrual cups?
5. Have you experienced any health issues & Have you ever consulted a doctor for any such issues?

___________________________________________________________________________

**SECTION E: SUGGESTIONS & WAY FORWARD (All Participants)**

1. What changes or support would make menstrual cup use easier for women? (New users and for dropouts)
2. How can existing programs (Menstrual Hygiene Scheme) better support women during the initial cycles?

\

**___________________________________________________________________________**

**CLOSING**

1. Is there anything else you would like to share about your menstrual experiences that we haven’t discussed?
2. Thank you for your valuable time and for sharing your experiences.

___________________________________________________________________________
